# Supplementary material for: Photocatalytic aerobic oxidation of amines to imines on BiVO4 under visible light irradiation
Source: Royal Society of Chemistry journal article supplement (doi:10.1039/c4cc07097f), 2014-01-01
Supplement: c4cc07097f1.pdf [file c4cc07097f1.pdf]

## Electronic Supplementary Information

### Visible-light Photocatalytic Aerobic oxidation of amine to imine by $\text{BiVO}_4$

*State Key Laboratory of Catalysis, Dalian Institute of Chemical Physics, Chinese Academy of Sciences, Dalian 116023, China. E-mail: yanliu503@dicp.ac.cn, canli@dicp.ac.cn*

#### Materials and Instruments:

All reagents and solvents used were obtained commercially and used without further purification. GC measurements were made with GC7890 equipped with a FID detector and HP-5 or  $\beta$ -DEX 225 column using Argon as the carrier gas. The ultraviolet–visible diffuse reflectance (Uv-Vis) spectra were collected on a JASCO V-550 spectrometer. The X-ray diffraction (XRD) of these samples were carried at room temperature on an X-ray diffractometer (Rigaku) using Cu  $K\alpha$  as X-ray radiation under 40kV and 30mA. The scanning electron microscopy (SEM) images were taken on a Quanta 200 FEG scanning electron microscope.  $\text{N}_2$  adsorption–desorption isotherms (BET) were measured at 77 K, using a Micromeritics ASAP 2000 analyzer.

#### Catalyst preparation:

The procedures for synthesis of  $\text{BiVO}_4$  samples in the present work are based on a hydrothermal approach. Typically, 1.4575g (3mmol) of  $\text{Bi}(\text{NO}_3)_3 \cdot 5\text{H}_2\text{O}$  was ultrasonicated in 300mL water to dissolved it evenly. Then 1.2020g (3mmol) of  $\text{Na}_3\text{VO}_4 \cdot 12\text{H}_2\text{O}$  was added with vigorous stirring and a yellow precipitate was formed. Subsequently, the yellow solution was stirred for 30 minutes and tuned the pH from 7-2 with 2M  $\text{HNO}_3$  solution. After that, the solution was stirred for another 1 hour and transferred to 100mL Telfon-sealed autoclave and maintained at 433K for 12 hours. The resulting sample was recovered by filtration, washed by water and dried at 333K in oven.

### Typical Procedure for the Oxidation of Amines:

The photocatalytic reactions were carried out under irradiation by a 300W Xe lamp with continuous stirring in a 15mL Pyrex glass bottle (cut-off light below 420nm). The Pyrex glass bottle was sealed with a glass stopper, connected to a O<sub>2</sub> balloon and surrounded with water to cool between 18°C and 22°C. A typical reaction system contained 0.1mmol substrate and 20mg BiVO<sub>4</sub> in 8mL CH<sub>3</sub>CN. The products were analyzed by GC using 1,4-diisopropylbenzene as the internal standard. After the photocatalytic oxidation, the mixture was filtrated and the solvent in filtrate was removed by evaporation. Then the imine was characterized by <sup>1</sup>H NMR.

### The procedure for the amine oxidation using AgNO<sub>3</sub> as electron acceptor

The photocatalytic reactions were carried out under irradiation by a 300W Xe lamp with continuous stirring in a 15mL Pyrex glass bottle (cut-off light below 420nm). The Pyrex glass bottle was sealed with rubber stopper. After 0.1mmol of substrate, 0.1mmol of AgNO<sub>3</sub> and 8mL of CH<sub>3</sub>CN was added, the bottle was flushed with Argon for 1h. After the reaction, the products were analyzed by GC.

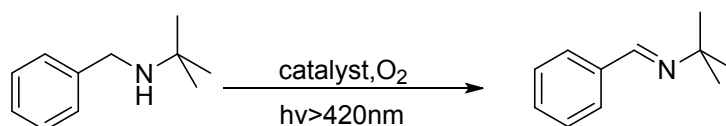

| substrate | O <sub>2</sub> | BiVO <sub>4</sub> | light | time | Conversion |
|-----------|----------------|-------------------|-------|------|------------|
| √         | √              | X                 | √     | 2h   | 1%         |
| √         | √              | √                 | X     | 2h   | 0          |
| √         | X              | √                 | √     | 2h   | 3%         |
| √         | √              | √                 | √     | 2h   | 47%        |

**Figure S1** Condition control experiment of N-t-butylbenzylamine oxidation

Reaction conditions:  $\lambda > 420\text{nm}$ , catalyst (100mg), N-t-butylbenzylamine (0.1mmol), CH<sub>3</sub>CN as a solvent (8mL), irradiation time : 2h, oxygen balloon (1 atm)

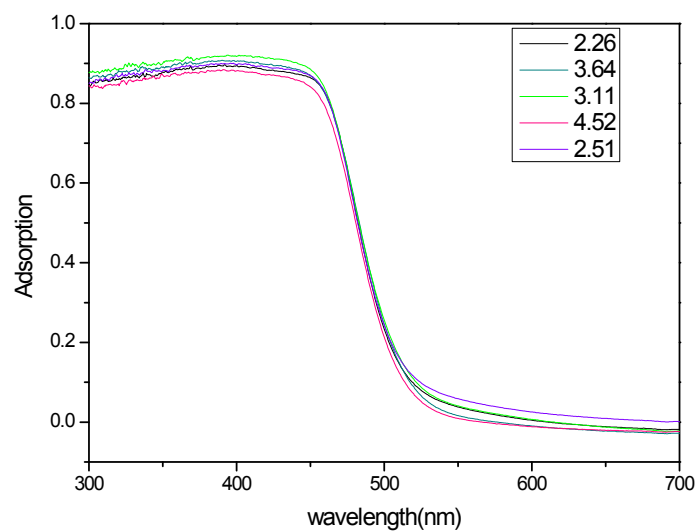

**Figure S2** Uv-Vis of various BiVO<sub>4</sub> photocatalyst prepared under different PH

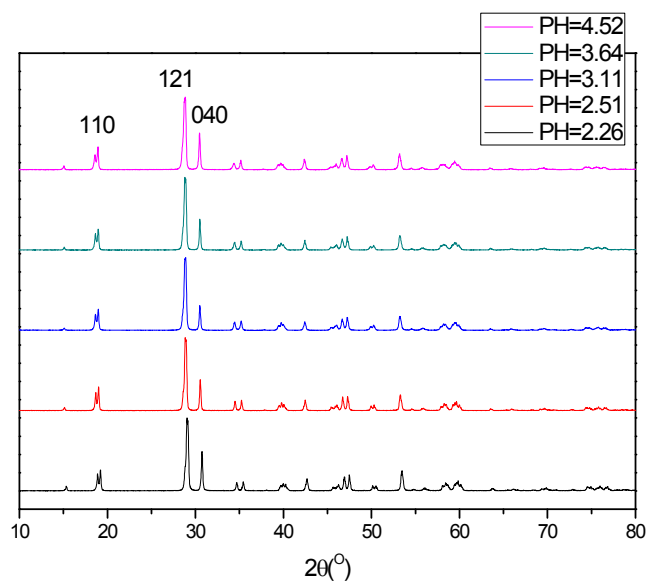

**Figure S3** XRD of various BiVO<sub>4</sub> photocatalyst prepared under different PH

| PH                                    | 2.26 | 2.51 | 3.11 | 3.64 | 4.52 |
|---------------------------------------|------|------|------|------|------|
| BET (m <sup>2</sup> g <sup>-1</sup> ) | 7    | 7    | 8    | 7    | 7    |
| Particle size (nm)                    | 36.2 | 34.7 | 34.2 | 33.8 | 30.8 |

**Figure S4** BET value and particle size (calculated by Scherrer equation on the 2θ of

30.548°) of various  $\text{BiVO}_4$  photocatalyst prepared under different PH

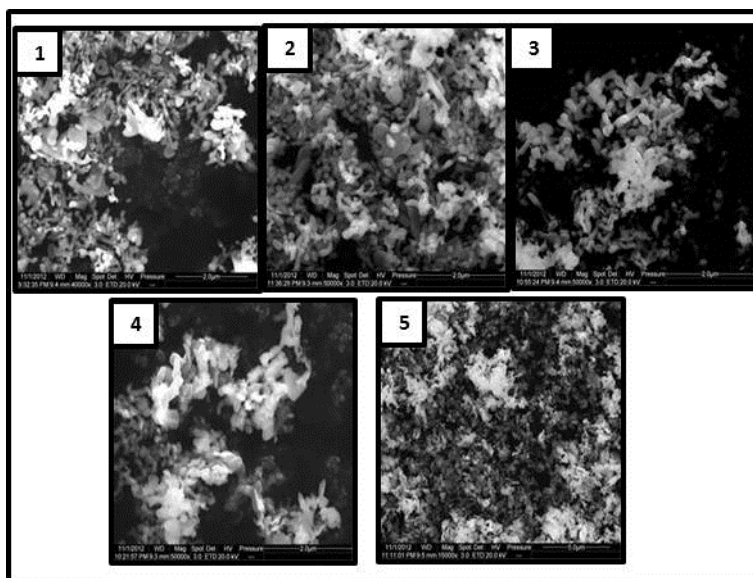

(1. PH=2.26; 2. PH=2.51; 3. PH=3.11; 4. PH=3.64; 5. PH=4.52)

**Figure S5** SEM of various  $\text{BiVO}_4$  photocatalyst prepared under different PH

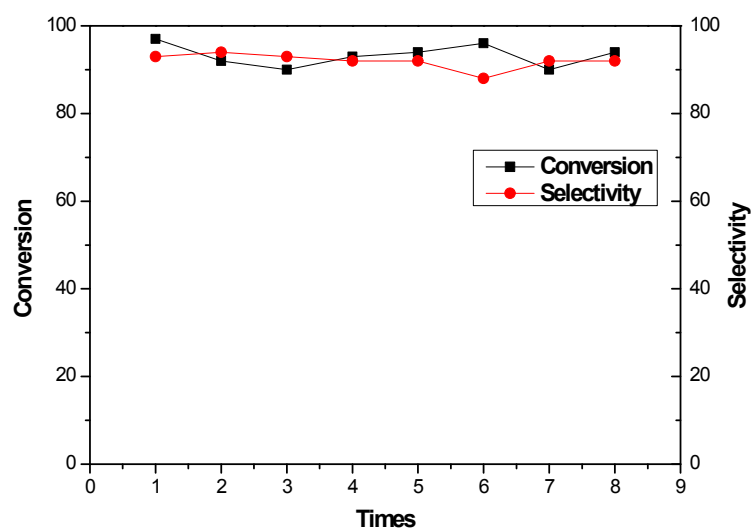

**Figure S6** The recycle test on the photocatalytic oxidation of N-t-butylbenzylamine  
 Reaction conditions:  $\lambda > 420\text{nm}$ , catalyst (100mg), N-t-butylbenzylamine (0.1mmol),  $\text{CH}_3\text{CN}$  as a solvent (8mL), irradiation time : 7h, oxygen balloon (1 atm)

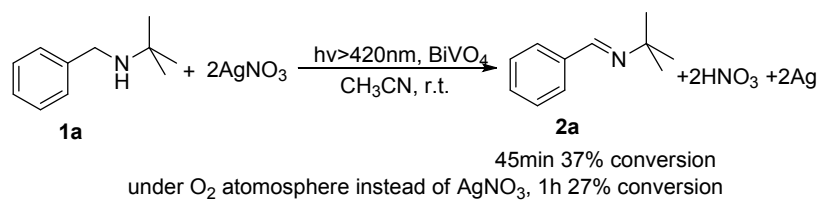

**Figure S7** The photocatalytic oxidation of amine **1a** using  $\text{AgNO}_3$  as the electron acceptor.
